# Supplementary material for: Biopsy vs. extensive resection for first recurrence of glioblastoma: is a prospective clinical trial warranted?
Source: PubMed Central journal article supplement (PMC4560929; doi:10.1186/s13104-015-1386-3), 2015-09-04
Supplement: 13104_2015_1386_MOESM2_ESM.pdf [file 13104_2015_1386_MOESM2_ESM.pdf]

```

\documentclass{article}
%
% for meaningless text
\usepackage{lipsum}
% for named colors
\usepackage[table]{xcolor}
% for \cellcolor
\usepackage{colortbl}
% for tables > 1 page
\usepackage{longtable}
\usepackage{hhline}
% for matrix (used in tikz plot)
\usepackage{array}
% multirow in tables
\usepackage{multirow}
% for 2-column format
\usepackage{multicol}
% change table numbering
\usepackage{chngcntr}
\counterwithin{table}{section}
% increase space between rows
\renewcommand{\arraystretch}{1.3}
\usepackage{booktabs}
%
% for 2-column entries in table
\newcommand{\myTwoCol}[1]{
  \textsl{#1}}
%
% for plotting
\usepackage{tikz}
\usetikzlibrary{arrows, shapes}

% version history
\usepackage{vhistory}
\newcommand{\docTitle}{Biopsy vs Extensive Resection for first
  recurrence of Glioblastoma: The \textbf{BERG} trail}
% for author - used by version history
\newcommand{\CD}{Christopher Dardis}
%
% place hyperref close to end
\usepackage[pagebackref]{hyperref}
\hypersetup{
  pdftitle = {\docTitle},
  pdfkeywords = {\docTitle,
    Version \vhCurrentVersion from \vhCurrentDate},
  pdfauthor = {\vhAllAuthorsSet},
  filebordercolor=cyan,
  linkbordercolor=cyan,
  urlbordercolor=cyan,
  runbordercolor=cyan
}
\usepackage{footnotebackref}
%% make footnotebackref work with longtable
\usepackage{etoolbox}
\patchcmd{\footnote}{\edef}{\xdef}{}{\errmessage{failed to patch}}
\makeatletter
\renewcommand\@makefnmark[1]{%
  \edef\@makefnmark{%
    \noexpand\mbox{\noexpand\textsuperscript{\noexpand\normalfont%
      \noexpand\hyperref[BackrefFootnoteTag]{\noexpand\@thefnmark}}\noexpand\,}%
    \BHFN@OldMakefnmark{#1}}%
\makeatother
%
% acronym needs go after hyperref
\usepackage[acronym, nomain, toc=true, numberline=true]{glossaries}
\makeglossaries
%
\begin{document}

\title{\docTitle}
\author{\vhListAllAuthorsLongWithAbbrev}
\date{Version \vhCurrentVersion\ from \vhCurrentDate}
\maketitle

\begin{versionhistory}
\vhEntry{0.1}{10/18/2013}{CD}{Created}
\vhEntry{0.2}{7/01/2014}{CD}{Updated}
\end{versionhistory}

%\title{Biopsy vs. Extensive Resection for first recurrence of Glioblastoma: The BERG trail}

```

```

%\maketitle

\newpage

% show only sections in contents
\setcounter{tocdepth}{1}
\tableofcontents
%
% autoformat numbers to 5 levels depth
% (avoids numbering subsubsections)
\setcounter{secnumdepth}{6}

\newpage

\section{Study team}

\begin{multicols}{2}

\subsection{Principal Investigator (Neurosurgery)}
\lipsum[66]

\subsection{Co-Investigator (Neuro-Oncology)}
\lipsum[66]

\columnbreak

\subsection{Neurosurgery:}
\lipsum[75]

\subsection{Neuro-Oncology:}
\lipsum[75]

\subsection{Radiation Oncology:}
\lipsum[75]

\end{multicols}

\newpage

\section{Schema}
\label{sec:sc}

\bigskip

% Define block styles
\tikzstyle{blockC} = [rectangle, draw, fill=blue!5, align=center,
text centered, rounded corners, minimum height=6em]
\tikzstyle{blockL} = [rectangle, draw, fill=blue!5, align=left,
text centered, rounded corners, minimum height=6em]
\tikzstyle{line} = [draw, -latex']

\begin{tikzpicture}
\matrix [column sep=5mm, row sep=7mm]{
% row 1
&
& \node [blockC] (e1) { \textbf{Enroll:} \\ \\
First recurrence of GBM \\ Age  $\geq 18$  \\ KPS
 $\geq 70$  \\ \textgreater 1 month since RT \\
Prior conventional treatment \\ Decompression not required \\
Resection possible
}; & \\
% row 2
& \node [blockL] (s1) {\quad \quad \quad \quad \quad \quad \quad \quad \quad
\textbf{Stratify: NRG scale} \\ \\
\quad \quad
\textbf{0 vs. 1 vs. 2 vs. 3} \\ \\
\textbullet \quad KPS  $\leq 80$  \\
\textbullet \quad tumor volume  $\geq 50$  cm-3 \\
\textbullet \quad  $\geq 2$  cortical areas involved: \\
\quad  $\circ$  Motor \\
\quad  $\circ$  Speech \\
\quad  $\circ$  MCA (affected areas adjacent to \\
\quad \quad the M1/M2 areas of the Middle Cerebral Artery)
}; & \\
% row 3
& \node [blockC] (r1) {\textbf{Randomize}
}; & \\
% row 3
& \node [inner sep = 0pt] (dummy) {}; & \\
% row 5
\node [blockC] (b1) {Open biopsy \\ \\ Bevacizumab}; &

```

```

&\node [blockC] (b2) {Resection \\\ \ Bevacizumab}; \\\
};
%
\draw[->] (e1) -- (s1);
\draw[->] (s1) -- (r1);
\draw[-] (r1) -- (dummy);
\draw[->] (dummy) -| (b1);
\draw[->] (dummy) -| (b2);

\end{tikzpicture}

\newpage

\newacronym{gbm}{GBM}{glioblastoma multiforme}
\newacronym{mri}{MRI}{magnetic resonance imaging}
\newacronym{ct}{CT}{computer automated tomography}
\newacronym{kps}{KPS}{Karnofsky performance status}
\newacronym{wcc}{WCC}{white cell count}
\newacronym{anc}{ANC}{absolute neutrophil count}
\newacronym{hb}{Hb}{hemoglobin}
\newacronym{ast}{AST}{aspartate transaminase}
\newacronym{alt}{ALT}{alanine aminotransferase}
\newacronym{uln}{ULN}{upper limit of normal (defined for institution)}
\newacronym{inr}{INR}{international normalized ratio}
\newacronym{egfr}{eGFR}{estimated glomerular filtration rate (MDRD method)}
\newacronym{bhcg}{bHCG}{beta human chorionic gonadotropin}
\newacronym{ivig}{ivIg}{intravenous immune globulin}
\newacronym{vegf}{VEGF}{vascular endothelial growth factor}
\newacronym{bsa}{BSA}{body surface area}
\newacronym{rt}{RT}{radiation therapy}
\newacronym{bp}{BP}{blood pressure}
\newacronym{rpIs}{RPLS}{reversible posterior leukoencephalopathy syndrome}
\newacronym{pres}{PRES}{posterior reversible leukoencephalopathy syndrome}
\newacronym{gi}{GI}{gastrointestinal}
\newacronym{nos}{NOS}{not otherwise specified}
\newacronym{nci}{NCI}{National Cancer Institute}
\newacronym{tmz}{TMZ}{temozolomide}
\newacronym{mos}{mOS}{median overall survival}
\newacronym{pfs6}{PFS-6}{progression free survival at 6 months}
\newacronym{ctepaers}{CTEP-AERS}{Cancer Therapy Evaluation Program Adverse Event Reporting System}
\newacronym{irb}{IRB}{institutional review board}
\newacronym{ae}{AEs}{adverse events}
\newacronym{mab}{mAb}{monoclonal antibody}
\newacronym{rtog}{RTOG}{Radiation Therapy Oncology Group}
\newacronym{speer}{SPEER}{Specific Protocol Exceptions to Expedited Reporting}
\newacronym{caepR}{CAEPR}{Comprehensive Adverse Event and Potential Risks list}
\newacronym{iv}{IV}{intravenous}
\newacronym{dhhs}{DHHS}{Department of Health and Human Services}
\newacronym{fda}{FDA}{Food and Drug Administration}
\newacronym{fsh}{FSH}{follicle-stimulating hormone}
\newacronym{cns}{CNS}{central nervous system}
\newacronym{upc}{UPC}{urine protein creatinine}
\newacronym{wnl}{WNL}{within normal limits}
\newacronym{hr}{HR}{hazard ratio}
\newacronym{nrg}{NRG}{NIH Recurrent GBM scale}

\printglossary[type=\acronymtype, title=Abbreviations, toctitle=Abbreviations]

\newpage

\section{Eligibility}
\label{sec:ec}
\begin{Form}
% optional make all boxes checked as true by default
% \makeatletter \Fld@checkedtrue \makeatother
\begin{center}
\textbf{Eligibility checklist}
\end{center}

\begin{enumerate}
\item \CheckBox{-} History of \gls{gbm}
\item \CheckBox{-} First recurrence
\item \CheckBox{-} Age \textgreater 18
\item \CheckBox{-} \gls{kps}  $\geq 70$ 
\item \CheckBox{-} \textgreater 1 month since \gls{rt}
\item \CheckBox{-} Prior conventional treatment (Stupp regimen)
\item \CheckBox{-} \textbf{No} need for surgical decompression
\item \CheckBox{-} Resection possible
\item \CheckBox{-} \textbf{No} sign diffuse spread of disease or leptomeningeal disease

```

\item 14 days prior to enrollment:

```
\begin{enumerate}
\item \CheckBox-{} History \& physical exam
\item \CheckBox-{} Brain imaging shows probable signs of progression
of disease. \gls{mri} scans are preferred but \gls{ct} is
acceptable if there is a contraindication to the use of \gls{mri}
\item \CheckBox-{} Steroid dose stable or decreasing for at least 7
days
\item \CheckBox-{} \Gls{bp} - systolic \textless 160, diastolic \textless
90. Use of antihypertensives permitted
\item \CheckBox-{} \Gls{wcc} \textgreater 3,000/mm \textsuperscript{3}
\item \CheckBox-{} \Gls{anc} \textgreater 1,500/mm \textsuperscript{3}
\item \CheckBox-{} Platelets \textgreater 100,000/mm \textsuperscript{3}
\item \CheckBox-{} \Gls{hb} \textgreater 10 g/dL
\item \CheckBox-{} \Gls{ast}, \gls{alt}, bilirubin \textless 3 \gls{uln}
\item \CheckBox-{} \Gls{inr} \textless 1.5 \gls{uln}
\item \CheckBox-{} \Gls{egfr} \textgreater 60mL/min/1.73m \textsuperscript{2}
\item \CheckBox-{} If potentially pregnant - serum \gls{bhcg} negative
\end{enumerate}
```

```
\item \CheckBox-{} \underline{1 month} prior: \textbf{no} major surgery
\item \CheckBox-{} \underline{3 months} prior: \textbf{no} history of non-healing wounds,
ulcers or bone fractures
\item \underline{6 months} prior:
```

```
\begin{enumerate}
\item \CheckBox-{} \textbf{No} unstable angina or myocardial infarct
\item \CheckBox-{} \textbf{No} heart failure requiring hospitalization
\item \CheckBox-{} \textbf{No} stroke or transient ischemic attack
\end{enumerate}
```

```
\item \CheckBox-{} \underline{3 years} prior: \textbf{No} other malignancy (not including
completely excised basal or squamous cell skin cancer)
\item \CheckBox-{} If sexually active, agrees to practice adequate
contraception during study and for 6 months thereafter
\item \CheckBox-{} \textbf{No} major autoimmune condition requiring immune
suppression e.g. etanercept, infliximab, ivIg
\item \CheckBox-{} \textbf{No} prior treatment with anti-VEGF targeted
treatments e.g. bevacizumab, cediranib, vandetanib, aflibercept,
sunitinib, sorafenib
\end{enumerate}
```

\end{Form}

The Eligibility Checklist must be completed in its entirety prior to registration. The completed, signed, and dated checklist used at study entry will be retained in the patients study file.

\newpage

\section{Registration}

\subsection{Procedure}

Patient registration will be conducted in accordance with routine hospital protocol. Enrolled patients will be further registered in a de-identified database maintained by the Research Nurse.

\subsection{Data collection at registration}

\begin{Form}

```
% optional make all boxes checked as true by default
% \makeatletter \Fld@checkedtrue \makeatother
\begin{center}
\textbf{Checklist for study enrollment}
\end{center}
```

```
\begin{enumerate}
\item \CheckBox-{} Name of person randomizing case
\item \CheckBox-{} Eligibility checklist completed
\item \CheckBox-{} Investigator considers patient eligible
\item Informed consent:
```

```
\begin{enumerate}
\item \CheckBox-{} For trial participation
\item \CheckBox-{} For tissue and blood to be kept for use in
research to learn about, prevent or treat cancer
\item \CheckBox-{} To allow someone from this institution to contact
him or her in the future to take part in more research
\end{enumerate}
```

\item Patient:

```

\begin{enumerate}
\item \CheckBox-{} Initials
\item \CheckBox-{} Identification number
\item \CheckBox-{} Gender
\item \CheckBox-{} Date of birth
\item \CheckBox-{} \Gls{kps}
\item \CheckBox-{} Weight
\item \CheckBox-{} \Gls{bsa}
\end{enumerate}
\item Physicians:
\begin{enumerate}
\item \CheckBox-{} Neurosurgeon
\item \CheckBox-{} Oncologist (Neuro-Oncology or Medical Oncology)
\item \CheckBox-{} Radiation Oncologist
\end{enumerate}
\item Dates:

\begin{enumerate}
\item \CheckBox-{} First resection
\item \CheckBox-{} Started radiation
\item \CheckBox-{} Completed radiation
\item \CheckBox-{} Started temozolomide
\item \CheckBox-{} Completed temozolomide
\item \CheckBox-{} Registered for this trial
\item \CheckBox-{} Randomized for this trial
\end{enumerate}
\end{enumerate}
\end{Form}

```

```

\bigskip \bigskip \bigskip
\noindent
\underline{\hspace{0.75\textwidth}}\\
Printed name

```

```

\bigskip \bigskip \bigskip
\noindent
\underline{\hspace{0.75\textwidth}}\\
Completed by

```

```

\bigskip \bigskip \bigskip
\noindent
\underline{\hspace{0.3\textwidth}}\\
Date

```

**\newpage**

**\section{Rationale}**

**\subsection{Background}**

\Gls{gbm} (World Health Organization Grade IV astrocytoma), is the most common primary brain tumor in adults and portends a very poor prognosis. \cite{Louis07} Its incidence is estimated to be 3.2/100,000 in the United States. \cite{CBTRUS2012}

Standard therapy for patients with newly diagnosed \gls{gbm} usually involves maximal surgical resection, followed by \gls{rt} (typically 60 Gray, given in 30 fractions) with concomitant and adjuvant \gls{tmz} for at least 6 months. The addition of \gls{tmz} to \gls{rt} has increased \gls{mos} from 12.1 months to 14.6 months, and 2-year survival from 10\% to 26\%. \cite{Stupp2005}

Recurrence of \gls{gbm} is almost inevitable. A meta-analysis of 8 Phase II studies involving 225 patients with recurrent \gls{gbm}, \gls{mos} after disease recurrence was 25 weeks and the \gls{pfs6} was 15\%. \cite{Wong1999}

Accurately diagnosing recurrence remains a challenge. Pseudo-progression occurs on follow-up imaging in 20-30\% of patients imaged at 2 months when treated with standard adjuvant \gls{rt} and \gls{tmz}. \cite{Taal2008}. In order to differentiate tumor recurrence from radiographic pseudo-progression, a surgical specimen remains the gold standard.

**\subsection{Surgery}**

In some cases surgery is essential in order to relieve mass effect caused by tumor growth. However in most cases, once recurrence of tumor has been confirmed (typically by frozen-section performed at the time of surgery), surgery proceeds with the goal of removal of as much of the remaining tumor as possible.

There has been considerable debate about the merits of such a

strategy. This is reflected, for example, in the Canadian recommendations for the treatment of recurrent or progressive GBM, which states

```
\begin{quote}
```

In the absence of level 1 evidence, the decision to re-operate should be made according to individual circumstances, in consultation with the multidisciplinary team and the patient.

```
\end{quote} \cite{Easaw2011}
```

By contrast the National Comprehensive Cancer Network guideline for recurrent (local) \gls{gbm} favors resection when possible. \cite{NCCN2013}

A recent review of literature on the subject, the most comprehensive to date (evaluating 11 studies), concluded that there is no established role for surgery in this setting. \cite{Brandes2013} Age and \gls{kps} were identified as generally important prognostic predictors and to a lesser extent, size of tumor.

```
\subsection{Bevacizumab}
```

Regardless of the decision on whether to proceed with surgery (of whatever extent), some form of additional chemotherapy at recurrence is generally agreed to be worthwhile where possible. Although no one agent has yet been endorsed by existing guidelines, all of them give prime consideration of bevacizumab.

Although no phase III trial has been performed to validate this strategy, it has been approved by the \gls{fda} on the basis of two phase II studies, both published in 2009. In that by Friedman et al., those using bevacizumab alone had a \gls{pfs6} of 43\% and \gls{mos} of 40 (95\% CI 35.6-46.5) weeks. \cite{Friedman2009} That by Kresyl et al. showed a \gls{mos} of 31 (95\%CI 21-54) weeks. \gls{pfs6} was 57\% (95\%CI 44-75). \cite{Kresyl2009} This was a favorable outcome with respect to historical controls, for example those treated with temozolomide alone.

```
\section{Objectives}
```

```
\subsection{Primary objectives}
```

```
\subsubsection{To evaluate the impact of biopsy versus extensive resection on time to progression after first recurrence of \gls{gbm}}
```

```
\subsection{Secondary objectives}
```

```
\subsubsection{To evaluate the impact of biopsy versus extensive resection on \gls{pfs6}}
```

```
\subsubsection{To assess the impact of biopsy versus extensive resection on quality of life, as measured by \gls{kps}}
```

```
\section{Surgery}
```

```
\subsection{Resection}
```

Patients randomized to microsurgical resection will undergo routine, image-guided cytoreduction targeting the contrast-enhancing portion of the lesion on T1-weighted contrast-enhanced \gls{mri}. Intraoperative adjuncts, including and not limited to, 5-aminolevulinic acid, intraoperative \gls{mri}, and intraoperative mapping techniques, will be included as needed per the primary neurosurgeon. Gliadel\textregistered (carmustine) wafers will not be placed.

```
\subsection{Biopsy}
```

Patients randomized to open biopsy will under routine, image-guided open biopsies using a minimal craniotomy and open microsurgical techniques. (This does \emph{not} include stereotactic needle biopsy).

```
\section{Drug treatment: bevacizumab}
```

```
\subsection{Overview}
```

In both treatment arms, patients will be treated post-operatively with bevacizumab. The first treatment will be administered on post-operative day 28.

```
\subsection{Dose}
```

Bevacizumab will be administered at a dose of 10 mg/kg every 2 weeks. Doses will be adjusted if there is a \textgreater 10\% change in weight. While every effort will be made to keep bevacizumab infusions exactly 14 days apart, it is acknowledged that occasionally a dose must be given off schedule due to logistical reasons. A window of  $\pm$  4 days for bevacizumab dosing is acceptable.

```
\subsection{Administration}
```

Bevacizumab will be administered intravenously as per current institutional guidelines, with associated pre-medications where required.

### `\subsection{Duration of treatment}`

Treatment with bevacizumab will continue until progression of disease or significant toxicity occurs. Treatment may be held for `\textgreater` grade 3 toxicities as defined in section~`\ref{subsec:ae}`. If the patient does not meet criteria to resume treatment within 28 days of the date of the toxicity, they will be removed from the study treatment.

### `\subsubsection{Description and packaging}`

Bevacizumab is a humanized IgG1 `\gls{mab}` that binds all biologically active isoforms of human `\gls{vegf}` with high affinity. The `\gls{mab}` consists of a human IgG1 framework and the antigen-binding, complementarity-determining regions from the murine anti-`\gls{vegf}` `\gls{mab}` A.4.6.1.16-18.

Vials contain bevacizumab with phosphate, trehalose, polysorbate 20, and sterile water for injection.

### `\subsubsection{Administration}`

Bevacizumab should be administered as a continuous intravenous infusion using a rate regulating device per institutional guidelines. Pre-medications (e.g. ondansetron, diphenhydramine, dexamethasone) will be given as per local guidelines. It should not be administered as an `\gls{iv}` push or bolus.

The first dose should be given over a minimum of 90 minutes. If no adverse reactions occur, the second dose should be given over 60 minutes. If no adverse reactions occur, subsequent doses can be given over a minimum of 30 minutes. If infusion-related adverse reactions occur, all subsequent infusions should be administered over the shortest period that was well tolerated.

### `\subsubsection{Storage}`

Vials contain no preservative and are suitable for single use only.

### `\subsubsection{Supply}`

Bevacizumab is available commercially.

## `\subsection{\Gls{ae}}`

### `\label{subsec:ae}`

For studies with participating centers in the USA and registered with the `\gls{nci}`, this is done through the `\gls{ctepaers}`. To facilitate reporting, a list of reported and/or potential `\gls{ae}` associated with an agent is provided by the `\gls{caep}`. This uses a uniform presentation of events by body system.

In table `\ref{tab:ae}`

below, these are shown for bevacizumab. In addition to the comprehensive list, a subset subset of `\gls{ae}` is shown which are protocol specific exceptions to expedited reporting to the `\gls{nci}` via `\gls{ctepaers}`. These are the `\gls{speer}`. This list is based on a recent `\gls{rtog}` study involving bevacizumab. `\cite{rtog0825}`

`\Gls{ae}`s listed on the `\gls{speer}` should be reported expeditiously by investigators to the `\gls{nci}` via `\gls{ctepaers}` only if they `\emph{exceed}` the grade of the event listed in parentheses after the event.

`\begin{center}`

`\label{tab:ae}`

`\begin{longtable}{@{}`

`>{\raggedright}p{3cm}`

`>{\raggedright}p{5cm}`

`>{\raggedright}p{3.5cm}`

`c`

`@{ }`

`\toprule`

`\multicolumn{4}{c}{Adverse events reported with`

`bevacizumab}\tabularnewline %`

`\midrule %`

`\textsc{Likely (\textgreater 20\%)} & \textsc{Less likely (\leq`

`20\%)} & \textsc{Rare (\textless 3\%)} &`

`\textsc{SPEER}\tabularnewline %`

`\midrule`

`\endfirsthead`

`\caption{Reported adverse events (continued)} \tabularnewline%`

`\midrule %`

`\textsc{Likely (\textgreater 20\%)} & \textsc{Less likely (\leq`

`20\%)} & \textsc{Rare (\textless 3\%)} &`

`\textsc{SPEER}\tabularnewline %`

`\hhline{---}`

`\endhead`

```

\endfoot
\bottomrule
\endlastfoot
% start of table cells:
\multicolumn{4}{c}{Blood and lymphatic system
  disorders\cellcolor[gray]{0.9}\tabularnewline %
& Anemia & & 3 \tabularnewline %
& & Blood and lymphatic system disorders - Other (renal thrombotic
microangiopathy) \tabularnewline %
& Febrile neutropenia & & 3\tabularnewline %
\multicolumn{4}{c}{Cardiac disorders
  \cellcolor[gray]{0.9}\tabularnewline %
& Supraventricular tachycardia & & 3\tabularnewline %
& & Acute coronary syndrome \tabularnewline %
& & Ventricular arrhythmia \tabularnewline %
& & Ventricular fibrillation \tabularnewline
\multicolumn{4}{c}{Ear and labyrinth disorders
  \cellcolor[gray]{0.9}\tabularnewline %
& Vertigo \tabularnewline %
\multicolumn{4}{c}{Gastrointestinal disorders
  \cellcolor[gray]{0.9}\tabularnewline %
& Abdominal pain & & 3\tabularnewline %
& Colitis & & 3\tabularnewline %
& Constipation & & 3\tabularnewline %
& Colitis & & 3\tabularnewline %
& Diarrhea & & 3\tabularnewline %
& Dyspepsia & & 2\tabularnewline %
& & Gastrointestinal fistula\footnote{Gastrointestinal fistula may
include: Anal fistula, Colonic fistula, Duodenal fistula,
Esophageal fistula,Gastric fistula, Gastrointestinal fistula,
Rectal fistula, and other sites under the GASTROINTESTINAL
DISORDERS SOC.} \tabularnewline %
& Gastrointestinal hemorrhage\footnote{Gastrointestinal hemorrhage
may include: Colonic hemorrhage, Duodenal hemorrhage, Esophageal
hemorrhage, Esophageal varices hemorrhage, Gastric hemorrhage,
Hemorrhoidal hemorrhage, Intraabdominal hemorrhage, Oral
hemorrhage, Rectal hemorrhage, and other sites under the
GASTROINTESTINAL DISORDERS SOC.} \tabularnewline %
& Gastrointestinal obstruction\footnote{Gastrointestinal
obstruction may include: Colonic obstruction, Duodenal
obstruction, Esophageal obstruction, Ileal obstruction, Jejunal
obstruction, Rectal obstruction, Small intestinal obstruction,
and other sites under the GASTROINTESTINAL DISORDERS SOC.} &
\tabularnewline %
& & Gastrointestinal perforation\footnote{Gastrointestinal
perforation may include: Colonic perforation, Duodenal
perforation, Esophageal perforation, Gastric perforation,
Jejunal perforation, Rectal perforation, Small intestinal
perforation, and other sites under the GASTROINTESTINAL
DISORDERS SOC} & \tabularnewline %
& & Gastrointestinal ulcer\footnote{Gastrointestinal ulcer may
include: Duodenal ulcer, Esophageal ulcer, Gastric ulcer, and
other sites under the GASTROINTESTINAL DISORDERS
SOC.}\tabularnewline %
& Ileus \tabularnewline %
& Mucositis oral & & 3\tabularnewline %
& Nausea & & 3\tabularnewline %
& Vomiting & & 3\tabularnewline %
\multicolumn{4}{c}{General disorders and administration site
  conditions \cellcolor[gray]{0.9}\tabularnewline %
& Fatigue & & 3\tabularnewline %
& Infusion-related reaction & & 2\tabularnewline %
& Non-cardiac chest pain & & 3\tabularnewline %
& Pain & & 3\tabularnewline %
\multicolumn{4}{c}{Immune system disorders
  \cellcolor[gray]{0.9}\tabularnewline %
& Allergic reaction & & 2\tabularnewline %
& & Anaphylaxis \tabularnewline %
\multicolumn{4}{c}{Infections and infestations
  \cellcolor[gray]{0.9}\tabularnewline %
& Infection \footnote{Infection may include any of the 75
infection sites under the INFECTIONS AND INFESTATIONS SOC.} & &
3\tabularnewline %
& Infections and infestations - Other (peri-rectal abscess) & &
\tabularnewline %
\multicolumn{4}{c}{Injury, poisoning and procedural complications
  \cellcolor[gray]{0.9}\tabularnewline %
& & Gastrointestinal anastomotic leak \tabularnewline %
& Wound dehiscence & & 2 \tabularnewline
\multicolumn{4}{c}{Investigations
  \cellcolor[gray]{0.9}\tabularnewline %

```



& \Gls{alt} increased & & 3\tabularnewline %  
 & \Gls{ast} increased & & 3\tabularnewline %  
 & Blood bilirubin increased & & 2\tabularnewline %  
 & Alkaline phosphatase increased & & 3\tabularnewline %  
 & Cardiac troponin I increased & \tabularnewline %  
 & \Gls{anc} decreased & & 3\tabularnewline %  
 & Weight loss & & 3\tabularnewline %  
 & \Gls{wcc} decreased & & 3\tabularnewline %  
 \multicolumn{4}{c}{Metabolism and nutrition disorders  
 \cellcolor[gray]{0.9}\tabularnewline %}  
 & Anorexia & & 3\tabularnewline %  
 \multicolumn{4}{c}{Musculoskeletal and connective tissue disorders  
 \cellcolor[gray]{0.9}\tabularnewline %}  
 & Arthralgia & & 3\tabularnewline %  
 & Musculoskeletal and connective tissue disorder - Other (bone  
 metaphyseal dysplasia)\footnote{Metaphyseal dysplasia was observed  
 in young patients who still have active epiphyseal growth  
 plates.} & \tabularnewline %  
 & Myalgia & & 3\tabularnewline %  
 & Osteonecrosis of jaw \footnote{Cases of osteonecrosis of the jaw  
 have been reported in cancer patients in association with  
 bevacizumab treatment, the majority of whom had received prior  
 or concomitant treatment with \gls{iv} bisphosphonates.} & \tabularnewline %  
 \multicolumn{4}{c}{Nervous system disorders  
 \cellcolor[gray]{0.9}\tabularnewline %}  
 & Dizziness & & 2\tabularnewline %  
 & Headache & & 3\tabularnewline %  
 & Intracranial hemorrhage \tabularnewline %  
 & & Ischemia cerebrovascular \tabularnewline %  
 & Peripheral sensory neuropathy \footnote{ Increased rate of  
 peripheral sensory neuropathy has been observed in trials  
 combining bevacizumab and chemotherapy compared to chemotherapy  
 alone.}& \tabularnewline %  
 & & \Gls{rpls} & \tabularnewline %  
 & Syncope & \tabularnewline %  
 \multicolumn{4}{c}{Renal and urinary disorders  
 \cellcolor[gray]{0.9}\tabularnewline %}  
 & Acute kidney injury \tabularnewline %  
 & Hematuria & & 3\tabularnewline %  
 & Proteinuria & & 2\tabularnewline %  
 & Renal and urinary disorders - Other (Nephrotic Syndrome) & \tabularnewline %  
 & Urinary fistula \tabularnewline %  
 \multicolumn{4}{c}{Reproductive system and breast disorders  
 \cellcolor[gray]{0.9}\tabularnewline %}  
 Reproductive system and breast disorders - Other (ovarian failure)  
 \footnote{Ovarian failure, defined as amenorrhea lasting 3 or more  
 months with \gls{fsh} elevation ( $\geq 30$  mIU/mL), was  
 increased in patients receiving adjuvant bevacizumab plus  
 mFOLFOX compared to mFOLFOX alone (34\% vs. 2\%). After  
 discontinuation of bevacizumab, resumption of menses and an  
 \gls{fsh} level  $\leq 30$  mIU/mL was demonstrated in 22\%  
 (7/32) of these women. Long term effects of bevacizumab exposure  
 on fertility are unknown.} \tabularnewline %  
 & Vaginal fistula \tabularnewline %  
 & Vaginal hemorrhage & & 3\tabularnewline %  
 \multicolumn{4}{c}{Respiratory, thoracic and mediastinal disorders  
 \cellcolor[gray]{0.9}\tabularnewline %}  
 & Allergic rhinitis & & 3\tabularnewline %  
 & Bronchopleural fistula \tabularnewline %  
 & Bronchopulmonary hemorrhage \tabularnewline %  
 & Cough & & 3\tabularnewline %  
 & Dyspnea & & 2\tabularnewline %  
 & Epistaxis & & 3\tabularnewline %  
 & Hoarseness & & 3\tabularnewline %  
 & Respiratory, thoracic and mediastinal disorders - Other  
 (nasalseptal perforation) \tabularnewline %  
 & Respiratory, thoracic and mediastinal disorders - Other  
 (tracheo-esophageal fistula) \tabularnewline %  
 \multicolumn{4}{c}{Skin and subcutaneous tissue disorders  
 \cellcolor[gray]{0.9}\tabularnewline %}  
 & Pruritis & & 2\tabularnewline %  
 & Rash maculo-papular & & 2\tabularnewline %  
 & Urticaria & & 2\tabularnewline %  
 \multicolumn{4}{c}{Vascular disorders  
 \cellcolor[gray]{0.9}\tabularnewline %}  
 Hypertension & & & 3\tabularnewline %  
 & Thromboembolic event & & 3\tabularnewline %  
 & Vascular disorders - Other (arterial thromboembolic event)  
 \footnote{Arterial thromboembolic event includes visceral arterial

```

        ischemia, peripheral arterial ischemia, heart attack, and
        stroke.} \tabularnewline %
    \end{longtable}
\end{center}
%
The following have also been reported with bevacizumab but causality
has not been established.
%

```

```

\begin{center}
\begin{longtable}{@{}
>{\raggedright}p{7cm}
>{\raggedright}p{7cm}
@{}
} \toprule
\multicolumn{2}{c}{Other adverse events reported with bevacizumab}
\tablearnewline %
\midrule %
\textsc{Body system}& \textsc{Adverse event} \tablearnewline
\midrule
\endfirsthead
\caption{Possible adverse events (continued)}\tablearnewline %
\midrule %
\textsc{Body system}& \textsc{Adverse event} \tablearnewline %
\endhead
\endfoot
\bottomrule
\endlastfoot
Blood and lymphatic system disorders & Blood and lymphatic system
disorders - Other (idiopathic thrombocytopenia
purpura)\tablearnewline %
& Disseminated intravascular coagulation\tablearnewline %
Cardiac disorders & Pericardial effusion \tablearnewline %
General disorders conditions & Gait disturbance \tablearnewline %
& Sudden death (not otherwise specified)\tablearnewline %
Hepatobiliary disorders & Hepatic failure\tablearnewline %
Infections and infestations & Infections and infestations - Other
(aseptic meningitis)\tablearnewline %
Investigations & Platelet count decreased\tablearnewline %
Metabolism and nutrition disorders & Hyponatremia\tablearnewline %
Musculoskeletal and connective tissue disorders & Musculoskeletal
and connective tissue disorder - Other (aseptic necrotic
bone)\tablearnewline %
& Musculoskeletal and connective tissue disorder - Other
(myasthenia gravis)\tablearnewline %
Nervous system disorders & Dysgeusia\tablearnewline %
& Peripheral motor neuropathy \tablearnewline %
& Seizure\tablearnewline %
Psychiatric disorders & Confusion\tablearnewline %
Respiratory, thoracic and mediastinal disorders & Adult
respiratory distress syndrome\tablearnewline % &
Pneumonitis\tablearnewline %
& Pneumothorax\tablearnewline %
& Pulmonary hypertension\tablearnewline %
Skin and subcutaneous tissue disorders & Palmar-plantar
erythrodysesthesia syndrome\tablearnewline %
& Skin ulceration\tablearnewline %
\end{longtable}
\end{center}

```

**Bevacizumab Dose Modifications**

There will be no dose reduction for bevacizumab. Treatment should be interrupted or stopped for certain adverse events, as described in table \ref{tab:dm}. If bevacizumab is interrupted for \textgreater 8 weeks, the patient should stop bevacizumab treatment on protocol.

```

\begin{center}
\label{tab:dm}
\begin{longtable}{@{}
>{\raggedright}p{2cm}
>{\raggedright}p{3cm}
p{9cm}
@{}
} \toprule
\multicolumn{3}{c}{Treatment Modification for Bevacizumab-Related
Adverse Events}\tablearnewline \hline{---} %
\textsc{Event}& \textsc{Grade} & \textsc{Action to be
taken}\tablearnewline %
\midrule %
\endfirsthead
\caption{Treatment modifications (continued)}\tablearnewline %

```

```

\midrule %
\textsc{Event}& \textsc{Grade} & \textsc{Action to be
taken}\tabularnewline %
\midrule %
\endhead
\endfoot
\bottomrule
\endlastfoot
\multirow{3}{*}{\parbox{2cm}{\raggedright Allergic reactions or
Acute infusional reactions/ cytokine release syndrome}} &
Grade 1-3 & If infusion-related or allergic reactions occur,
premedications should be given with the next dose and infusion
time may not be reduced for the subsequent
infusion.\tabularnewline %
& & For patients with grade 3 reactions, bevacizumab infusion
should be stopped and not restarted on the same day. At the
physicians' discretion, bevacizumab may be permanently stop or
re-instituted with premedications and administered patient should
be closely monitored for a duration comparable to or longer than
the duration of the previous reactions.\tabularnewline %
& Grade 4 & Stop bevacizumab\tabularnewline %
\hline{---} %
\glsunset{cns} % show CNS as abbreviation first time
Arterial Thrombosis: Cardiac ischemia/ infarction, \gls{cns} ischemia
(TIA, CVA), any peripheral or visceral arterial ischemia/
thrombosis & Grade 2 & If new or worsened since bevacizumab
therapy: Stop bevacizumab\tabularnewline %
& Grade 3-4 & Stop bevacizumab\tabularnewline %
\hline{---} %
Venous Thrombosis & Grade 3 or asymptomatic grade 4 & Hold
bevacizumab treatment. If the planned duration of full-dose
anticoagulation is \textless 2 weeks, bevacizumab should be held
until the full-dose anticoagulation period is
over.\tabularnewline %
& & If the planned duration of full-dose anticoagulation is
\textgreater 2 weeks, bevacizumab may be resumed during the period
of full-dose anticoagulation if \emph{all} of the criteria below are
met:\tabularnewline %
& -- & The subject must have an in-range INR (usually 2-3) on a
stable dose of warfarin or be on a stable dose of heparin prior to
restarting bevacizumab\tabularnewline %
& -- & The subject must not have pathological conditions that
carry high risk of bleeding (eg, tumor involving major vessels or
other conditions)\tabularnewline %
& -- & The subject must not have had hemorrhagic events while on
study\tabularnewline %
& & If thromboemboli worsen/recur upon resumption of study
therapy, stop bevacizumab\tabularnewline %
& Grade 4 (symptomatic) & Stop bevacizumab\tabularnewline %
\hline{---} %
Hypertension \footnote{Definitions \begin{description}
\item [grade 1] asymptomatic, transient (\textless 24 hours)
increase by \textgreater 20 mmHg (diastolic) or to
\textgreater 150/100 if previously \gls{wnl}; intervention not
indicated
\item [grade 2] recurrent or persistent (\textgreater 24 hours)
or symptomatic increase by \textgreater 20 mmHg (diastolic) or
to \textgreater 150/100 if previously \gls{wnl}; monotherapy may be
indicated
\item [grade 3] requiring more than one drug or more intensive
therapy than previously
\item [grade 4] life threatening (eg, hypertensive crisis)
\end{description}
} & \multicolumn{2}{p{12cm}}{\myTwoCol{Treat with antihypertensive
medication as needed. The goal of BP control should be
consistent with general medical practice.}}\tabularnewline %
& Grade 1 & Consider increased BP monitoring\tabularnewline %
& Grade 2 asymptomatic & If diastolic BP \textless 100 mmHg: begin
anti-hypertensive therapy and continue
bevacizumab\tabularnewline %
& Grade 2-3 & If symptomatic or diastolic BP \textgreater 100
mmHg: hold bevacizumab until symptoms resolve and BP \textless
160/90mmHg\tabularnewline %
& Grade 4 & Stop bevacizumab\tabularnewline %
\hline{---} %
Congestive Heart Failure & Grade 3-4 & Stop
bevacizumab\tabularnewline %
\hline{---} %
Proteinuria & \multicolumn{2}{p{12cm}}{\myTwoCol{Proteinuria should be
monitored by urine analysis for \gls{upc}
ratio prior to every other dose of bevacizumab}}\tabularnewline %
& \gls{upc} ratio \textless 3.5 & Continue bevacizumab\tabularnewline %

```

```

& \gls{upc} ratio  $\geq$  3.5 & Hold bevacizumab until \gls{upc} \textless
3.5\tabletabularnewline %
& Grade 4 or nephrotic syndrome & Stop
bevacizumab\tabletabularnewline %
\hhline{---} %
Hemorrhage (\gls{cns} or pulmonary) & Grade 2-4 & Stop
bevacizumab\tabletabularnewline %
Hemorrhage (non-\gls{cns}; non-pulmonary) & Grade 3 & Patients receiving full-dose
anticoagulation should stop bevacizumab\tabletabularnewline %
& & For patients not on full-dose anticoagulation, hold
bevacizumab until all of the following criteria are
met:\tabletabularnewline %
& & - the bleeding has resolved and Hb is stable\tabletabularnewline %
& & - there is no bleeding diathesis that would increase the risk
of therapy\tabletabularnewline %
& & - there is no anatomic or pathologic condition that could
increase the risk of hemorrhage recurrence.\tabletabularnewline %
& & Patients who experience recurrence of grade 3 hemorrhage
should stop study therapy\tabletabularnewline %
& Grade 4 & Stop bevacizumab\tabletabularnewline %
\hhline{---} %
\glsunset{pres} % show PRES as abbrev first time
\gls{rpls} or \gls{pres} & \multicolumn{2}{p{12cm}}{\myTwoCol{Hold bevacizumab if
symptoms/signs suggestive of \gls{rpls}; subsequent management should
include \gls{mri} scans and control of hypertension. Stop bevacizumab upon
diagnosis of \gls{rpls}}}\tabletabularnewline %
\hhline{---} %
\multicolumn{2}{p{5cm}}{Wound dehiscence requiring medical or
surgical intervention} & Stop bevacizumab\tabletabularnewline %
\hhline{---} %
\multicolumn{2}{p{5cm}}{GI perforation, GI leak or fistula} & Stop
bevacizumab\tabletabularnewline %
\hhline{---} %
Bowel obstruction & Grade 2 requiring medical intervention & Hold
bevacizumab until complete resolution, with a minimum of 4 weeks
after surgery.\tabletabularnewline %
& Grade 3-4 & Hold bevacizumab until complete
resolution\tabletabularnewline %
& & If surgery is required, patient may restart bevacizumab after
full recovery from surgery, and at investigator's
discretion\tabletabularnewline %
\hhline{---} %
\multirow{2}{*}{\parbox{2cm}{\raggedright Other unspecified
bevacizumab-related AEs (except controlled nausea/ vomiting)}}
& Grade 3 & Hold bevacizumab until symptoms resolve to  $\leq$ 
grade 1\tabletabularnewline %
& Grade 4 & Stop bevacizumab\tabletabularnewline %
& & Upon consultation with the study chair, resumption of
bevacizumab may be considered if a patient is benefiting from
therapy and the grade 4 toxicity is transient, has recovered to
 $\leq$  grade 1 and unlikely to recur with
retreatment\tabletabularnewline %
\tabletabularnewline
% \tabletabularnewline % need extra line due to long text in multirow above
\end{longtable}
\end{center}

```

### \section{Monitoring}

Patients will follow up with their Oncologist at monthly intervals. \gls{mri}s will be repeated every 2 months, or more frequently if there are new symptoms or signs concerning for disease progression. \Gls{kps} will be assessed at each visit.

### \section{Treatment at time of progression}

At time of subsequent progression, the patient will be re-evaluated at our multidisciplinary conference. Decisions will be individualized but will include the options of further surgery, further \gls{rt}, a change in chemotherapy, treatment with electrical fields (NovoTTF \textregistered) and Palliative care.

### \section{Statistical considerations}

#### \subsection{Sample size and power justification}

The primary objective of this study is to determine whether extensive resection plus bevacizumab (experimental arm) will improve the overall survival compared to open biopsy plus bevacizumab (control arm). The division into experimental and control arms is somewhat arbitrary as both are established treatments at the time of progression and neither has clearly been shown to be superior.

Essentially, this is a Phase III design. The randomization of

experimental and control arms is 1:1. The null hypothesis is that the median PFS for both arms will be 18 weeks, based on data from two Phase II trials of bevacizumab at time of recurrence. \cite{Friedman2009}\cite{Kresy12009} The alternative hypothesis is that patients treated with *an attempt at complete resection* plus bevacizumab will have an improvement in overall survival to 23 weeks (Gls{hr} of 1.3). This is based on a review of existing literature (retrospective series) on this subject, which is detailed in the article describing this trial.

Following the methods of Therneau, we assume that the survival distributions will be exponential. \cite{Therneau2000} The Gls{hr} is thus the reciprocal of the ratio of median survival times. We aim for a power of 80% and a significance level of 0.05 (two-sided). This would result in a sample size of 456 (assuming all patients are treated as assigned and followed until to to progression). A typical range of power and sample sizes is illustrated in table \ref{tab:pwr} for the above significance level, following the method of Schoenfeld. \cite{Schoenfeld1983}

```
\glsreset{hr}
\begin{table}[!h]
\caption{Sample size for  $p < 0.05$  (two-sided)}
\begin{center}
\label{tab:pwr}
\begin{tabular}{@{} l l l l @{}}
\toprule
& \multicolumn{3}{c}{Gls{hr}} \tabularnewline
\cmidrule {2-4}
Power & 1.2 & 1.4 & 2.0 \tabularnewline
\midrule
70\% & 742 & 218 & 51 \tabularnewline
80\% & 945 & 277 & 65 \tabularnewline
90\% & 1264 & 370 & 87.5 \tabularnewline
\bottomrule
\end{tabular}
\end{center}
\end{table}
```

Given the risks associated with overestimating the effect size in the study, which would lead to the study being underpowered, we prefer the more conservative margin of a Gls{hr} of 1.2. Thus, we aim for for a sample size of 945.

Following a review of cases over the preceding 3 years (2009-2012), we estimate that our institution sees 50-70 cases/year of first recurrence of Gls{gbm} who had previously received standard of care (the Stupp regimen, i.e. concurrent Gls{rt} and Gls{tmz} followed by adjuvant Gls{tmz}). \cite{Stupp2005} This numbers seen appear to be stable over this time period. We will include those who were receiving this regimen as part of another trial. We estimate that 60-70% will be eligible for entry, and agreeable, to participation in the study, giving approximately 40 entrants/year.

Given the more optimistic threshold of a Gls{hr} of 1.3, the trial would take 11 years to accrue. With the more conservative Gls{hr} of 1.2, the trial would need to run for c. 23 years.

#### \subsection{Patient accrual}

This study is projected to accrue 3-4 patients/month. If the average accrual is \textless 2 patients/month (6 months after trial activation), the study will be re-evaluated with respect to feasibility.

#### \subsection{Patient selection and randomization}

All cases will be reviewed at our weekly weekly Multidisciplinary Central Nervous System Tumor Conference. Enrollment will be considered for all patients meeting the eligibility criteria. \ref{sec:ec} Patients will be stratified at the time of enrollment; this will be followed by randomization, as shown in the study schema \ref{sec:sc}.

#### \subsection{Analysis plans}

In general, comparisons between groups will have a significance (type I error) of  $p < 0.05$  (2-sided).

Progression-free and overall survival rates will be estimated using the Kaplan-Meier method. \cite{Kaplan1958} Differences between treatment arms will be tested with the log-rank test. \cite{Mantel1966} Gls{pfs6} and Gls{mos} will be measured from the date

of randomization to the date of death or, otherwise, to the last follow-up date on which the patient was known to be alive.

Proportions/ rates will be modelled using an exact binomial distribution, with 95% confidence intervals. These are: \gls{pfs6}, objective response, grade 3+ toxicities and acute or delayed \gls{cns} toxicities. For secondary endpoints, no adjustment is planned for multiple comparisons as these are exploratory tests.

\Gls{mos} and \gls{pfs6} will also be modelled with multivariate analyses using the Cox proportional-hazards model. The planned covariates of interest are:

```
\begin{itemize}
\item Protocol treatment (biopsy or extensive resection)
\item Age
\item Tumor volume at time of recurrence
\item \gls{kps}
\item \Gls{nrg}. \ \ Number of critical areas of cortex involved (0-3)\footnote{These
are
\begin{itemize}
\item Motor
\item Speech
\item MCA i.e. referring to affected areas adjacent to the M1/M2
areas of the Middle Cerebral Artery
\end{itemize}}
\item Time since original diagnosis
\end{itemize}
```

The assumption of proportional hazards will be checked using residuals and time-varying coefficients. If the data clearly do not follow proportional hazards, other statistical models will be used to fit the data instead. Possible alternatives are to use the stratified Cox proportional hazard model, accelerated failure model, or to partition the time axis into sections where proportional hazards assumption holds.

#### \subsection{Interim toxicity and futility analysis}

Interim analysis will be undertaken on an annual basis following the methods of O'Brien and Fleming. \cite{O'Brien1979} The study will be terminated if study should these initial results indicate a marked superiority of one treatment over the other.

#### \subsection{Significance Testing for Final Analysis}

The final analysis will be performed on an intention-to-treat basis, such that all eligible cases on the study will be included in the arm to which they were randomized, regardless of what treatment the patients actually received. The analysis to report the final results of treatment comparison between the experimental arm and the control arm will be undertaken once the required sample size has been accrued. If the  $p$  value is less than protocol-specified  $0.05$  (two-sided), the study Statistician will reject the null hypothesis and conclude that observing such a dataset would be highly unlikely if the outcome in both arms was really similar. Thus the data would support the hypothesis that the experimental arm improves progression-free survival. The final report will include all information reported in the interim analyses as well as treatment compliance and adverse events.

#### \section{Data collection}

##### \subsection{Data storage and analysis}

The Research Nurse assigned to this study will tabulate, store, and secure data in a single password-protected Excel\textregistered database located on a password-protected computer in their locked office. Data analysis will be completed by the Principal Investigator and Statistician.

##### \subsection{Data safety monitoring plan}

The Data Safety Monitoring Plan is written to ensure the safety of the participants and verifying the validity and integrity of the data. All adverse events will be reported to the \gls{irb} and \gls{fda} in an expedited manner within 10 days of occurrence. The investigator will continue to follow or obtain documentation of the resolution course of such an event.

##### \subsection{Ethical considerations and \ \ protection of human subjects}

For patients that meet the inclusion criteria, informed consent will be obtained at the time of consent for brain tumor surgery. The option to enter the trial will be presented to the patient, if he/she is able to consent, or to the legal guardian/durable power of attorney in all other circumstances.

For all patients, the risks, benefits

and alternatives of the trial will be discussed separately from those associated with the planned operation. Refusal to participate in the trial will not affect management strategies or therapeutic options.

#### `\subsection{Potential risks}`

The risks of study inclusion are similar to the risks of open neurosurgical tumor resection. This includes, but is not limited to, death, coma, infection, blood loss, and permanent neurological deficit.

#### `\subsection{Potential benefits}`

While the study provides no direct benefit to the patient, its findings may clarify the value of greater extent of resection for patients with recurrent glioblastoma.

#### `\subsection{What other alternatives are there?}`

If you decide not to participate in this research study, this will not affect the care to which you are entitled and will not influence your doctor in any way. If you decide not to participate, your doctor will discuss alternative treatment options with you. Some of these options may include open surgery, open biopsy, needle biopsy, and observation.

#### `\subsection{Protecting confidentiality}`

Each consented participant will be assigned a study identification number. All data will be collected and stored under this identification number, with no other identifying information such as name, date of birth, or social security number. All collected data will be kept on premises of the Hospital in a password-protected desktop computer located in a locked office accessible only to the Principal Investigator and Study Co-ordinator. A list of corresponding medical record numbers will be similarly tabulated and protected.

#### `\subsection{Costs}`

There will be no additional supply or equipment costs incurred to the patient or the hospital by this study. All proposed therapies are within the acceptable standards of current care options and will be billed to the patients insurance company, as would otherwise be the case.

#### `\newpage`

#### `\appendix`

`% turn off numbering`

`\setcounter{secnumdepth}{1}`

`\begin{center}`  
`{\bf APPENDIX}`  
`\end{center}`

`\section{Sample consent form}`

`\subsection{Why am I being asked to participate in this research study?}`

You have been identified as a possible candidate for participation in a clinical research study called 'Biopsy vs Extensive Resection for first recurrence of Glioblastoma: The BERG trial'. A research study is performed when physicians try find new ways to diagnose and/or treat illness. Since this research study is experimental and the anticipated results have not been proven, you need to know enough about the risks and benefits to decide if you want to participate. This process is called informed consent.

The Research Nurse working with the Principal Investigator for this research study, will discuss this study with you in detail. This Informed Consent document explains what will be expected of you and what risks or benefits you may anticipate if you agree to participate. You should read this document very carefully and ask as many questions as you need to fully understand what your involvement in this study means. Please understand that by signing this document you agree to participate in this experimental study.

`\subsection{How many people will take part in this study?}`

This Hospital is sponsoring this research study. It is being conducted only at this Hospital. A target of a total of \$945\$ patients will participate.

`\subsection{Why is this study being done?}`

This research study is designed to better understand the value of greater extent of resection when your tumor shows signs of recurrence. By randomizing patients to extensive resection vs. open biopsy, we will determine whether one has more clinical value than the other. This remains an unresolved question. All proposed treatments are already `\gls{fda}`-approved and are not experimental.

#### `\subsection{What is involved in this study?}`

If you choose to participate in this study, you will be selected for either open biopsy (where a small hole is made in the skull to take a piece of the abnormal tissue and make a diagnosis) or microsurgical resection (where an opening in the skull is made to expose all the abnormal tissue and remove everything that is safe). These are both currently standard therapy options for patients with your diagnosis. The purpose of the study is to determine which provides more clinical benefit. Following surgery, you will recover as you would normally and then, if the tissue that is removed is diagnosed as recurrent tumor, receive `\gls{iv}` bevacizumab, an anti-tumor agent that commonly given to patients at the time of recurrence. Your clinical follow-up after this will be no different than it would be otherwise, with routine appointments to see your Neuro-Oncologist and Neurosurgeon at regular intervals.

#### `\subsection{How long will I be on the study?}`

If you agree to take part in this study, we will continue up with you for at least 3 years. As stated above, no additional appointments will be needed during this time.

#### `\subsection{What are the risks of this study?}`

The risks of this study are similar to those that you would be faced with during routine management of your tumor.

#### `\medskip`

Risks associated with brain surgery, include death, neurological problems such as weakness, difficulty seeing or using language, blood loss, and infection.

#### `\medskip`

Risks associated with bevacizumab include wound infection, hematological abnormalities (low blood counts), and gastrointestinal problems.

#### `\subsection{Are there benefits to taking part in this study?}`

This study involves treatments which would be available to you outside the context of the study. However there may be benefits either to having a surgical resection or to having a biopsy alone in terms of quality of life and survival. Also, the knowledge gained from this study may benefit others in the future.

#### `\subsection{What other options are there?}`

If you decide not to participate in this research study, this will not affect the care to which you are entitled and will not influence your doctor in any way. If you decide not to participate, your doctor will discuss alternative treatment options with you. Some of these options may include open surgery, open biopsy, needle biopsy, and observation.

#### `\subsection{How will I be informed of additional information or new findings?}`

If you decide to participate, your doctor will keep you informed of any new findings that are discovered during the course of this study which may affect your continued willingness to participate in this study.

#### `\subsection{What about confidentiality?}`

Every attempt will be made to keep your participation in this research study and your records confidential. However, representatives from the `\gls{dhhs}`, from the `\gls{fda}` and the Hospital may inspect your research records to evaluate the results of this study. The results of this research study may also be published in scientific journals and/or may be presented at scientific meetings, but your identity will not be revealed.

#### `\medskip`

A description of this clinical trial will be made available on `\href{http://www.ClinicalTrials.gov}{ClinicalTrials.gov}`, as is required by U.S. Law. This Web site will not include information that can identify you. At most, the Web site will include a summary of the results. You can search this Web site at any time.

#### `\subsection{What are the costs?}`

There are no additional costs for you that are associated with this trial. As always, you understand that you will be responsible for payment of any bills that your insurance may refuse to pay due to your participation in this research study.

#### `\subsection{What happens if I am injured while participating in the study?}`

If you experience an injury or adverse event, please contact the Principal Investigator at 123 456 78910. If the investigator determines that the injury or adverse event is due to your participation in this research, this will be treated, although you are always responsible for the financial costs associated with your care. This does not waive your rights in the event of negligence.

#### `\subsection{What are my rights as a participant?}`



You understand that your participation in this research study is voluntary and that you are free to withdraw from this study at any time. If you decide not to participate, your doctor will not hold it against you in any way. If you decide to withdraw from this study at a later date, please notify the Principal Investigator of your decision and to discuss your alternative treatment options.

\medskip

You understand that your doctor may also stop your participation on this study if it is felt to be in the best interest of your health. This may be done without your consent, but alternative treatment options will be discussed with you.

\subsection{Whom do I call if I have questions?}

If you have any questions about this research study or your participation in it, please feel free to ask them now. If you think of questions later or have concerns about your participation, please call the Principal Investigator at 123 456 78910.

\medskip

If you have any questions about your rights as a research subject or about the Institutional Review Board for Human Research (IRB) at the Hospital. The board has reviewed this Informed Consent document for compliance with federal guidelines. They may be contacted at:

\bigskip

\noindent

Institutional Review Board\\

Hospital\\

Address\\

Phone no.

\bigskip

You are voluntarily deciding whether or not to participate in the research study described in this consent form. Your signature below indicates that you have read and understand the information provided, and that you have decided to participate. You will receive a copy of the signed informed consent document.

\subsection{Patient/ representative signature}

\bigskip \bigskip \bigskip

\noindent

\underline{\hspace{0.75\textwidth}}\\

Printed name

\newline \newline \newline \newline

\noindent

\underline{\hspace{0.75\textwidth}}\\

Signature

\newline \newline \newline

\noindent

\underline{\hspace{0.3\textwidth}}\\

Date

\newline \newline \newline \newline \newline

\noindent

\underline{\hspace{0.75\textwidth}}\\

Signature of Legally Authorized Representative

\newline \newline \newline

\noindent

\underline{\hspace{0.75\textwidth}}\\

Relationship to patient

\newline \newline \newline

\noindent

\underline{\hspace{0.75\textwidth}}\\

Reason patient is unable to sign

\newline \newline \newline

\noindent

\underline{\hspace{0.75\textwidth}}\\

Date

\newline \newline \newline

\noindent

\underline{\hspace{0.75\textwidth}}\\

Signature of Interpreter (If applicable)

%\newline \newline

\subsection{Principal investigator's signature}

\bigskip \bigskip

\noindent

\underline{\hspace{0.75\textwidth}}\\

Printed name

\newline \newline \newline \newline

\noindent

\underline{\hspace{0.75\textwidth}}\\

Signature

\newline \newline \newline

\noindent  
\underline{\hspace{0.3\textwidth}}\\Date

\newpage

\section{Rights of humans subjects in medical experiments}

\medskip

Any person who is requested to consent to participate as a subject in a research study involving a medical experiment or who is requested to consent on behalf of another has the right to:

- \begin{enumerate}
- \item Be informed of the nature and purpose of the experiment.
- \item Be given an explanation of the procedures to be followed in the medical experiment, and any drug or device to be utilized
- \item Be given a description of any attendant discomforts and risks reasonably to be expected from the experiment
- \item Be given an explanation of any benefits to the subject reasonable to be expected from the experiment, if applicable
- \item Be given a disclosure of any appropriate alternative procedures, drugs or devices that might be advantageous to the subject, and their relative risks and benefits
- \item Be informed of the avenues of medical treatment, if any available to the subject after the experiment if complications should arise
- \item Be given an opportunity to ask any questions concerning the experiment or the procedure involved
- \item Be instructed that consent to participate in the medical experiment may be withdrawn at any time and the subject may discontinue participation in the medical experiment without prejudice
- \item Be given a copy of any signed and dated written consent form used in relation to the experiment
- \item Be given the opportunity to decide to consent or not to consent to a medical experiment without the intervention of any element of force, fraud, deceit, duress, coercion or undue influence on the subjects decision
- \end{enumerate}

I attest that I, or my representative, discussed this study with the above named participant or legal representative. This person had enough time to consider this information, had an opportunity to ask questions, and voluntarily agreed to participate in this study.

\newpage

\section{Karnofsky performance scale}

- \begin{itemize}
- \item [100] Normal; no complaints; no evidence of disease
- \item [90] Able to carry on normal activity; minor signs or symptoms of disease
- \item [80] Normal activity with effort; some sign or symptoms of disease
- \item [70] Cares for self; unable to carry on normal activity or do active work
- \item [60] Requires occasional assistance, but is able to care for most personal needs
- \item [50] Requires considerable assistance and frequent medical care
- \item [40] Disabled; requires special care and assistance
- \item [30] Severely disabled; hospitalization is indicated, although death not imminent
- \item [20] Very sick; hospitalization necessary; active support treatment is necessary
- \item [10] Moribund; fatal processes progressing rapidly
- \item [0] Dead
- \end{itemize}

\begin{thebibliography}{99}

\bibitem{Louis07} Louis DN, Ohgaki H, Wiestler OD, et al. The 2007 WHO classification of tumours of the central nervous system. Acta neuropathologica 2007, 114:97-109.

\bibitem{CBTRUS2012} CBTRUS Statistical Report: Primary Brain and Central Nervous System Tumors Diagnosed in the United States in 2004-2008, 2012.

\bibitem{Taal2008} Taal W, Brandsma D, de Bruin HG, et al. Incidence of early pseudo-progression in a cohort of malignant glioma patients treated with chemoradiation with temozolomide. Cancer 2008,

- \bibitem{Stupp2005} Stupp R, Mason WP, van den Bent MJ, et al. Radiotherapy plus concomitant and adjuvant temozolomide for glioblastoma. *NEJM* 2005, 352:987-996.
- \bibitem{Wong1999} Wong ET, Hess KR, Gleason MJ, et al. Outcomes and prognostic factors in recurrent glioma patients enrolled onto Phase II clinical trials. *J Clin Oncol* 1999, 17:2572-2578.
- \bibitem{Easaw2011} Easaw JC, Mason WP, Perry J, et al. Canadian Glioblastoma Recommendations Committee. Canadian recommendations for the treatment of recurrent or progressive glioblastoma multiforme. *Curr Oncol* 2011, 18(3):126-136.
- \bibitem{NCCN2013} NCCN Guidelines Version 2.2013. Anaplastic gliomas/glioblastoma. \href{http://www.nccn.org/professionals/physician\_gls/pdf/cns.pdf}{Available online}
- \bibitem{Brandes2013} Brandes AA, Bartolotti M, Franceschi E. Second surgery for recurrent glioblastoma: advantages and pitfalls. *Expert Rev Anticancer Ther* 2013 13(5):583-587.
- \bibitem{Friedman2009} Friedman HS, Prados MD, Wen PY et al. Bevacizumab alone and in combination with irinotecan in recurrent glioblastoma. *J Clin Oncol*, 2009 27(28):4733-4740.
- \bibitem{Mantel1966} Mantel N. Evaluation of survival data and two new rank order statistics arising in its consideration. *Cancer Chem Rep* 1966 5:163-170.
- \bibitem{Kaplan1958} Kaplan EL, Meier P. Nonparametric estimation from incomplete observations. *J Am Stat Assoc* 1958 53:457-481
- \bibitem{Kreisl2009} Kreisl TN, Kim L, Moore K et al. Phase II trial of single-agent bevacizumab followed by bevacizumab plus irinotecan at tumor progression in recurrent glioblastoma. *J Clin Oncol*, 2009 27(5):740-745.
- \bibitem{Schoenfeld1983} Schoenfeld D. Sample-size formula for the proportional-hazards regression model. *Biometrics* 1983, 39:499-503.
- \bibitem{rtog0825} Gilbert M. Phase III Double-Blind Placebo-Controlled Trial of Conventional Concurrent Chemoradiation and Adjuvant Temozolomide Plus Bevacizumab versus Conventional Concurrent Chemoradiation and Adjuvant Temozolomide in Patients with Newly Diagnosed Glioblastoma. \href{http://www.rtog.org/ClinicalTrials/ProtocolTable/StudyDetails.aspx?study=0825}{Available online}
- \bibitem{Therneau2000} Therneau T, Grambsch P. *Modeling Survival Data: Extending the Cox Model*. Springer: New York; 2000.
- \bibitem{O'Brien1979} O'Brien P, Fleming T. A Multiple Testing Procedure for Clinical Trials. *Biometrics* 1979, 35:549-556.
- \end{thebibliography}
- \end{document}
